# Supplementary material
Source: PubMed Central journal article supplement (PMC2702124)
Supplement: NIHMS91089-supplement-1_si_001.pdf [file NIHMS91089-supplement-1_si_001.pdf]

## Supporting Information

### Role of Hydrophilic Residues in Proton Transfer

### During Catalysis by Human Carbonic Anhydrase II

Jiayin Zheng,<sup>‡</sup> Balendu Sankara Avvaru,<sup>§</sup> Chingkuang Tu,<sup>‡</sup>

Robert McKenna,<sup>§</sup> and David N. Silverman<sup>‡</sup>

<sup>‡</sup> *Department of Pharmacology and Therapeutics, §Department of Biochemistry and Molecular Biology, College of Medicine, University of Florida, Gainesville, Florida 32610.*

**Contents:** Two pages total containing two tables. Table SI1 contains the dihedral angles of three residues in the active-site cavity of wild-type HCA II and the variants N62A,V,D,T. Table SI2 contains the B factors for the ordered water molecules in the active-site cavity of the same variants.

**Table SI1.** Dihedral angles (°) for the side chains of three residues in the active-site cavity of five variants of HCA II.

|                 | N62A            | N62V            | N62D             | N62T                | Wild type <sup>a</sup> |
|-----------------|-----------------|-----------------|------------------|---------------------|------------------------|
| His 64 $\chi_1$ | 49 <sup>b</sup> | 51 <sup>b</sup> | -56 <sup>c</sup> | 50/-45 <sup>d</sup> | 44/-39 <sup>d</sup>    |
| His 64 $\chi_2$ | 89 <sup>b</sup> | 91 <sup>b</sup> | 111 <sup>c</sup> | 82/99 <sup>d</sup>  | 95/98 <sup>d</sup>     |
| Asn 67 $\chi_1$ | -54             | -67             | -55              | -69                 | -79                    |
| Asn 67 $\chi_2$ | 151             | 173             | 145              | 177                 | -178                   |
| Gln 92 $\chi_1$ | 63              | 56              | 63               | 55                  | 53                     |
| Gln 92 $\chi_2$ | 108             | 103             | 108              | 104                 | 106                    |
| Gln 92 $\chi_3$ | -51             | -32             | -64              | -31                 | -31                    |

<sup>a</sup> Data from the Protein Data Bank, accession code 2CBA. <sup>b</sup>Inward conformation. <sup>c</sup>Outward conformation. <sup>d</sup> Inward and outward orientations.

**Table SI2.** B-factors ( $\text{\AA}^2$ ) for the ordered water molecules in the active-site cavity of HCA II and variants.

|       | Wild type <sup>a</sup> | N62A | N62V | N62T | N62D | <b>Mean / Std.Dev</b> |
|-------|------------------------|------|------|------|------|-----------------------|
| Zn    | 7.8                    | 11.9 | 9.5  | 6.8  | 9.3  | 9.06 / 1.9            |
| Zn-OH | 8.3                    | 17.2 | 12.4 | 8.0  | 10.0 | 11.18 / 3.7           |
| W1    | 17.7                   | 21.1 | 18.4 | 14.0 | 15.2 | 17.28 / 2.7           |
| W2    | 19.1                   | 26.0 | 21.1 | 20.2 | 20.2 | 21.32 / 2.7           |
| W3a   | 15.5                   | 26.4 | 18.7 | 16.5 | 16.0 | 18.62 / 4.5           |
| W3b   | 17.5                   | 30.2 | 24.4 | 26.8 | 22.6 | 24.3 / 4.7            |

<sup>a</sup>Data from the Protein Data Bank, accession code 2CBA.
